# Supplementary material for: Ultrasensitive Detection of Interleukin 6 by Using Silicon Nanowire Field-Effect Transistors
Source: MDPI journal article supplement (doi:10.3390/s23020625), 2023-01-05
Supplement: s1 [file s1]

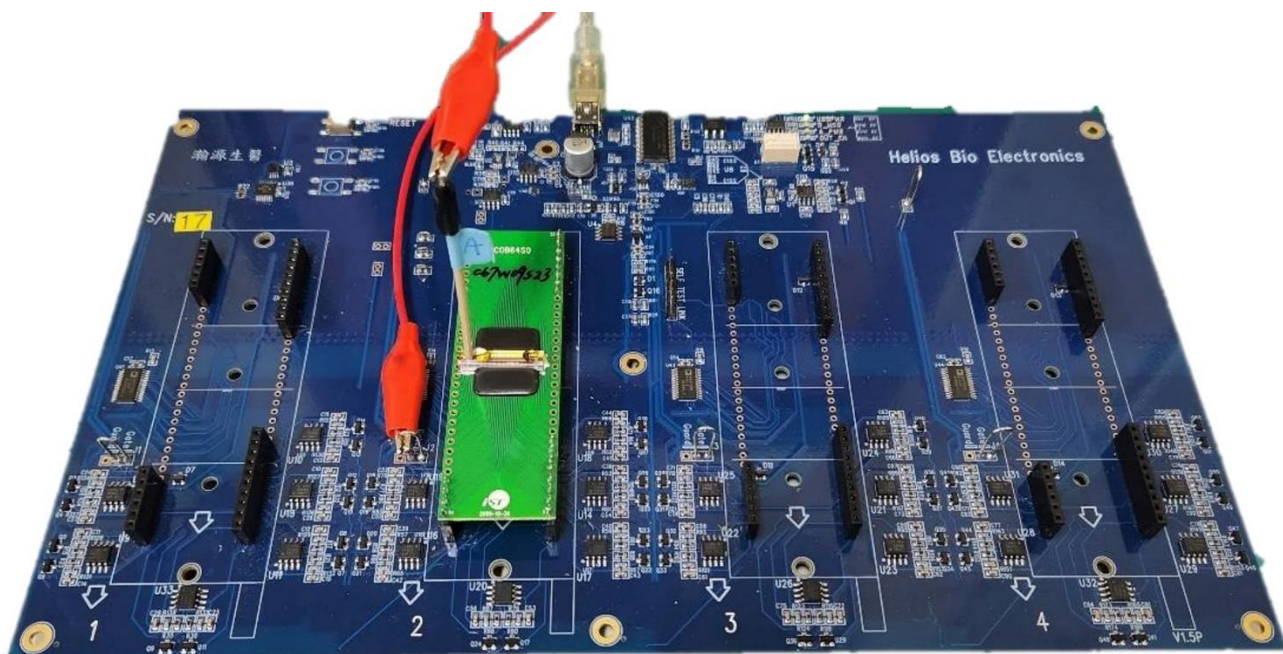

(a)

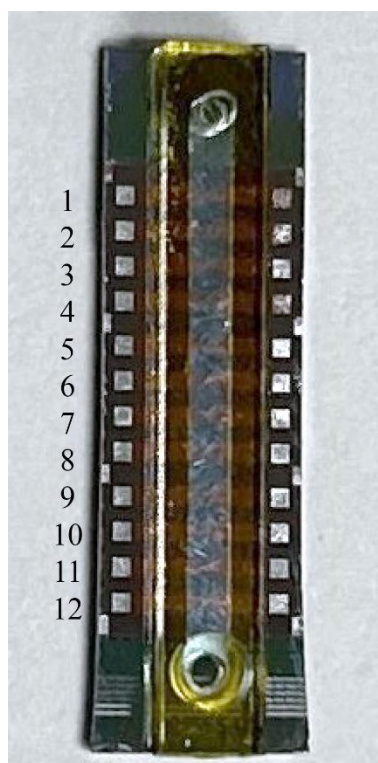

(b)

**Figure S1.** The packaged chip-on-board (COB) SiNW-FET is installed into an electrical circuit board for signal recording. (a) The overview of the circuit board and the packaged COB SiNW-FET. The  $V_g$  is applied using an electrode which is connected with the electrical board via a red wire. (b) Detailed features of the packaged COB SiNW-FET. It contains 12 SiNW-FET devices (24 nanowires), and the signals from 12 channels are recorded in the experiments (Ch1 = device 1, Ch2 = device 2, and so forth. The signal is generated from 2 nanowire channels for each SiNW-FET device.).

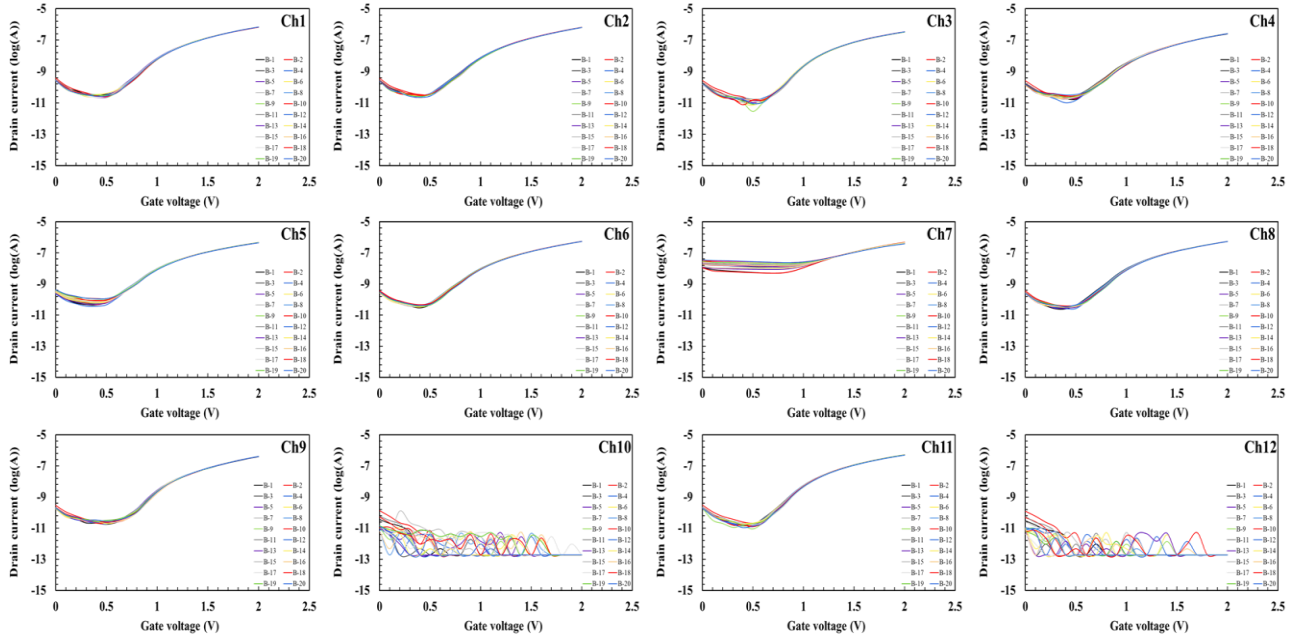

**Figure S2.** The stability test of the SiNW-FET devices without any modification. The test is conducted in the 50 mM BTP buffer (pH 7.4), and the measurement is repeated twenty times. Some devices have lousy quality, like channels 7, 10, and 12. By calculating the data obtained from other channels, the average values of the shift in gate voltage and standard deviation at the drain current ( $I_d$ ) of  $1 \times 10^{-9}$  A are 0.2 mV and 5.5 mV, respectively.



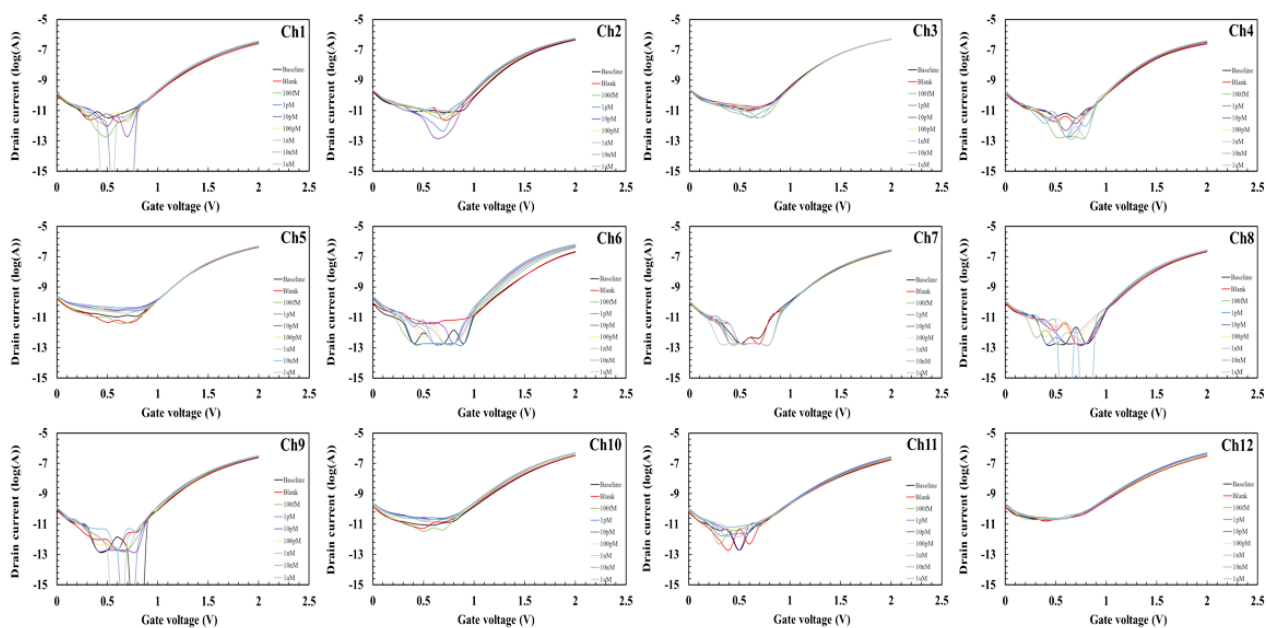

**Figure S4.** The  $I_d - V_g$  curves obtained from twelve channels of the SiNW-FET by using the aptasensor. The quality of each nanowire is not identical, and some of the nanowires have lousy quality, like channels 1, 8 and 9.

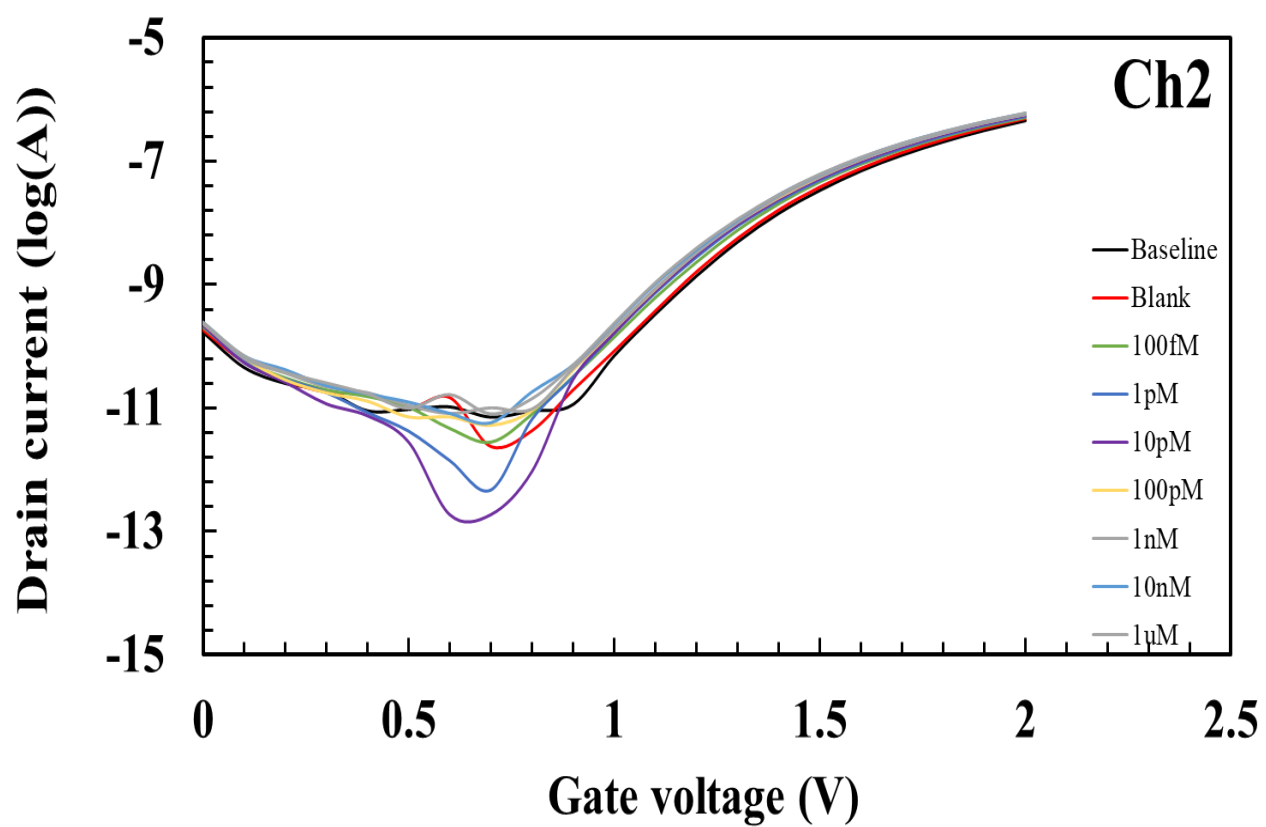

**Figure S5.** The enlargement image of recorded curves in channel 2 of Figure S4.

**Table S1.** Five examples of raw data for the detection of IL-6 on the SiNW-FETs with APTES-GA-Ab layer.

| Groups             | ch1 (mV) | ch2 (mV) | ch3 (mV) | ch4 (mV) | ch5 (mV)  |
|--------------------|----------|----------|----------|----------|-----------|
| Blank              | -26.1241 | -26.8943 | -10.9187 | -15.7991 | -12.75717 |
| 21 pg/mL (1 pM)    | -39.1889 | -44.3952 | -18.7305 | -26.1448 | -15.3422  |
| 210 ng/mL (10 pM)  | -50.0620 | -49.4864 | -21.687  | -37.2942 | -18.5127  |
| 2.1 ng/mL (100 pM) | -48.3429 | -49.8205 | -19.9994 | -34.8226 | -19.6162  |
| 21 ng/mL (1 nM)    | -50.9766 | -51.8415 | -25.7842 | -35.8480 | -22.6979  |
| 210 ng/mL (10 nM)  | -51.5569 | -53.0490 | -35.9350 | -48.3660 | -27.5862  |

**Table S2.** Five examples of raw data for the detection of IL-6 on the SiNW-FETs with APS-GA-Ab layer.

| Groups             | ch1 (mV) | ch2 (mV) | ch3 (mV) | ch4 (mV) | ch5 (mV) |
|--------------------|----------|----------|----------|----------|----------|
| Blank              | -14.9595 | -10.5056 | -6.8901  | -2.94781 | -15.7302 |
| 21 pg/mL (1 pM)    | -18.3867 | -18.4882 | -10.3212 | -10.3178 | -17.6109 |
| 210 ng/mL (10 pM)  | -21.2999 | -19.5811 | -17.5142 | -14.9990 | -20.6079 |
| 2.1 ng/mL (100 pM) | -23.2895 | -24.4332 | -21.0025 | -19.5168 | -24.8676 |
| 21 ng/mL (1 nM)    | -25.8483 | -26.1696 | -21.5488 | -18.8569 | -29.2589 |
| 210 ng/mL (10 nM)  | -24.9494 | -23.2263 | -27.5813 | -25.6442 | -29.9680 |

**Table S3.** Five examples of raw data for the detection of IL-6 on the SiNW-FETs with mSAMs-GA-Ab layer.

| Groups             | ch1 (mV) | ch2 (mV) | ch3 (mV) | ch4 (mV) | ch5 (mV) |
|--------------------|----------|----------|----------|----------|----------|
| Blank              | -9.8697  | -15.3840 | -24.6308 | -1.9136  | -1.4856  |
| 21 pg/mL (1 pM)    | -19.5492 | -22.1176 | -40.2115 | -10.5291 | -6.2969  |
| 210 ng/mL (10 pM)  | -36.3453 | -26.2015 | -62.5557 | -39.6697 | -16.9319 |
| 2.1 ng/mL (100 pM) | -46.7271 | -32.5584 | -75.8925 | -76.4369 | -39.0368 |
| 21 ng/mL (1 nM)    | -61.3980 | -27.8809 | -84.6234 | -92.1436 | -58.7537 |
| 210 ng/mL (10 nM)  | -63.1347 | -39.4248 | -81.3974 | -95.4557 | -51.9578 |

**Table S4.** Results of one-way analysis of variance (ANOVA) with Tukey's HSD Test for detecting various concentrations of Interleukin-6 on the SiNW-FETs with the mSAMs-GA-Apt layer.

| <b>(I)Groups</b>            | <b>(J)Groups</b>            | <b>Mean<br/>Difference (I-J)</b> | <b>Std. Error.</b> | <b>Sig.</b> |
|-----------------------------|-----------------------------|----------------------------------|--------------------|-------------|
| 2.1 pg/mL ( <b>100 fM</b> ) | 21 pg/mL( <b>1 pM</b> )     | 13.47412*                        | 4.47405            | .039        |
|                             | 210 pg/mL( <b>10 pM</b> )   | 19.56948*                        | 4.47405            | .000        |
|                             | 2.1 ng/mL ( <b>100 pM</b> ) | 23.66395*                        | 4.47405            | .000        |
|                             | 21 ng/mL ( <b>1 nM</b> )    | 38.86775*                        | 4.47405            | .000        |
|                             | 210 ng/mL ( <b>10 nM</b> )  | 39.57250*                        | 4.47405            | .000        |
| 21 pg/mL( <b>1 pM</b> )     | 2.1 pg/mL ( <b>100 fM</b> ) | -13.47412*                       | 4.47405            | .039        |
|                             | 210 pg/mL( <b>10 pM</b> )   | 6.09536                          | 4.47405            | .749        |
|                             | 2.1 ng/mL ( <b>100 pM</b> ) | 10.18983                         | 4.47405            | .215        |
|                             | 21 ng/mL ( <b>1 nM</b> )    | 25.39363*                        | 4.47405            | .000        |
|                             | 210 ng/mL ( <b>10 nM</b> )  | 26.09838*                        | 4.47405            | .000        |
| 210 pg/mL( <b>10 pM</b> )   | 2.1 pg/mL ( <b>100 fM</b> ) | -19.56948*                       | 4.47405            | .001        |
|                             | 21 pg/mL( <b>1 pM</b> )     | -6.09536                         | 4.47405            | .749        |
|                             | 2.1 ng/mL ( <b>100 pM</b> ) | 4.09447                          | 4.47405            | .942        |
|                             | 21 ng/mL ( <b>1 nM</b> )    | 19.29827*                        | 4.47405            | .001        |
|                             | 210 ng/mL ( <b>10 nM</b> )  | 20.00302*                        | 4.47405            | .000        |
| 2.1 ng/mL ( <b>100 pM</b> ) | 2.1 pg/mL ( <b>100 fM</b> ) | -23.66395*                       | 4.47405            | .000        |
|                             | 21 pg/mL( <b>1 pM</b> )     | -10.18983                        | 4.47405            | .215        |
|                             | 210 pg/mL( <b>10 pM</b> )   | -4.09447                         | 4.47405            | .942        |
|                             | 21 ng/mL ( <b>1 nM</b> )    | 15.20380*                        | 4.47405            | .013        |
|                             | 210 ng/mL ( <b>10 nM</b> )  | 15.90855*                        | 4.47405            | .008        |
| 21 ng/mL ( <b>1 nM</b> )    | 2.1 pg/mL ( <b>100 fM</b> ) | -38.86775*                       | 4.47405            | .000        |
|                             | 21 pg/mL( <b>1 pM</b> )     | -25.39363*                       | 4.47405            | .000        |
|                             | 210 pg/mL( <b>10 pM</b> )   | -19.29827*                       | 4.47405            | .001        |
|                             | 2.1 ng/mL ( <b>100 pM</b> ) | -15.20380*                       | 4.47405            | .013        |
|                             | 210 ng/mL ( <b>10 nM</b> )  | .70475                           | 4.47405            | 1.000       |
| 210 ng/mL ( <b>10 nM</b> )  | 2.1 pg/mL ( <b>100 fM</b> ) | -39.57250*                       | 4.47405            | .000        |
|                             | 21 pg/mL( <b>1 pM</b> )     | -26.09838*                       | 4.47405            | .000        |
|                             | 210 pg/mL( <b>10 pM</b> )   | -20.00302*                       | 4.47405            | .000        |
|                             | 2.1 ng/mL ( <b>100 pM</b> ) | -15.90855*                       | 4.47405            | .008        |
|                             | 21 ng/mL ( <b>1 nM</b> )    | -.70475                          | 4.47405            | 1.000       |

\*, The mean difference is significant at the .05 level.
